# Supplementary material for: Genomic innovations linked to infection strategies across emerging pathogenic chytrid fungi
Source: PubMed Central journal article supplement (PMC5364385; doi:10.1038/ncomms14742), 2017-03-21
Supplement: ncomms14742-s1.pdf [file ncomms14742-s1.pdf]

## Supplementary Figures

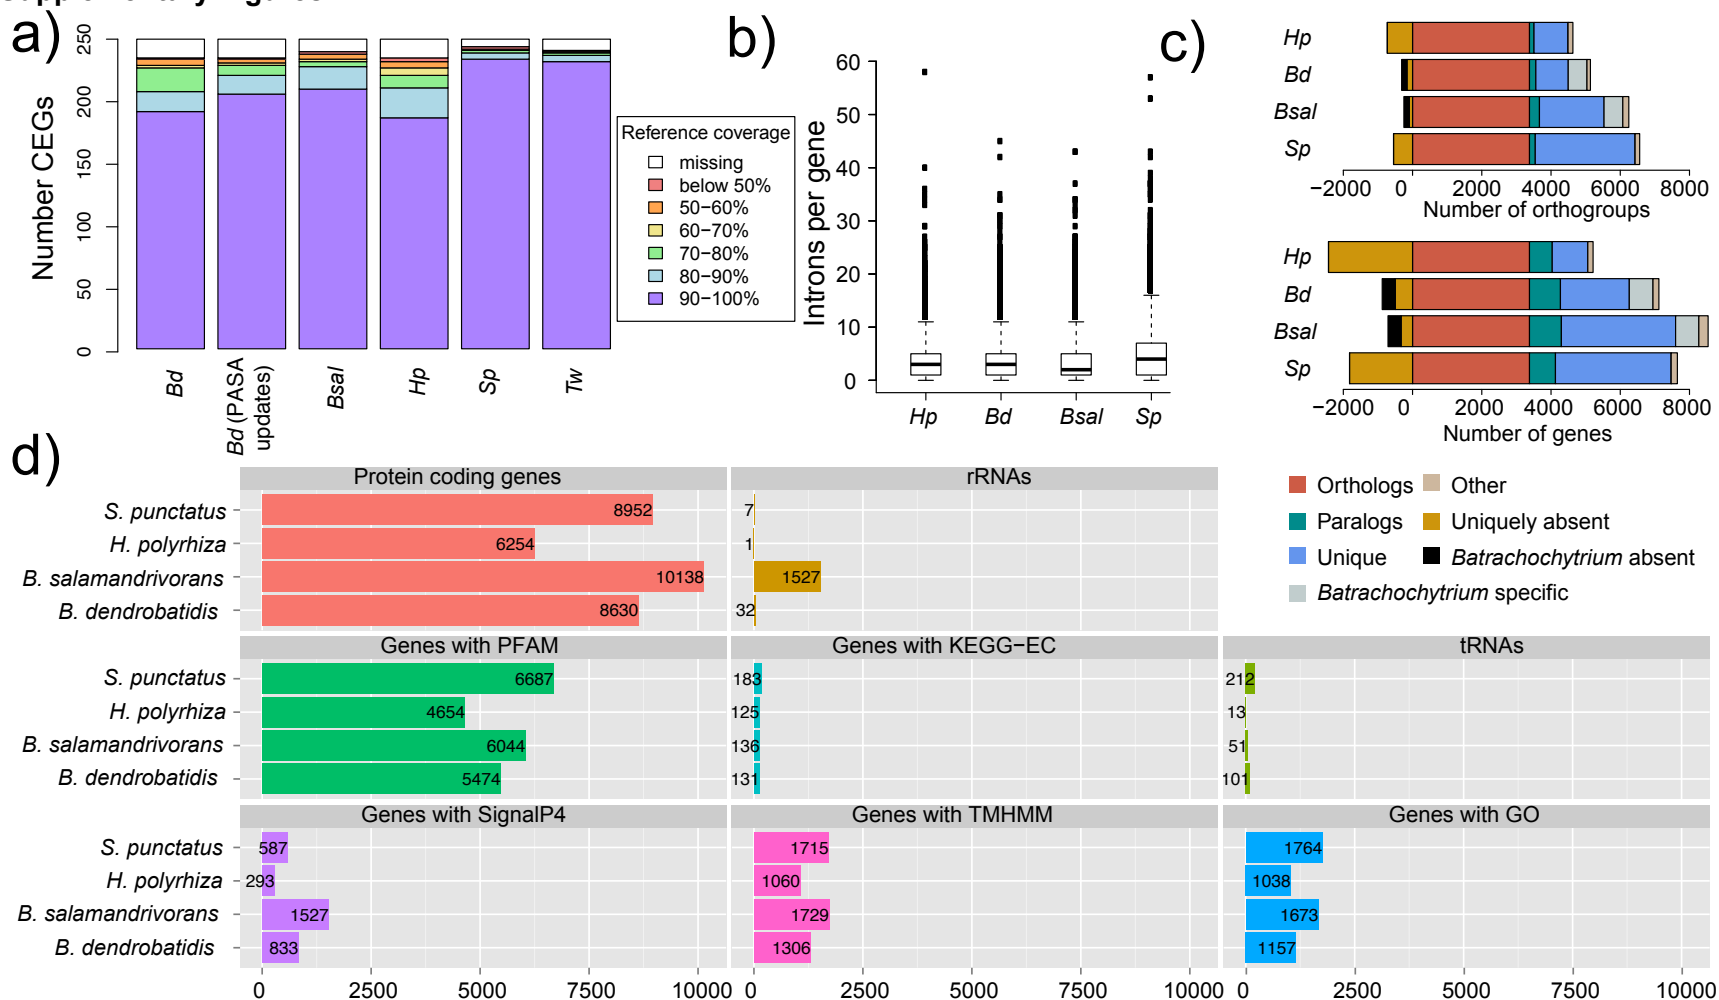

**Supplementary Figure 1 Assessments of the Chytridiomycota gene calls.** (a) All gene sets were compared against 248 core eukaryotic genes (CEGs), indicating a highly complete set to work with, as well as a substantial improvement for *Bd* using RNA-Seq data. (b) The number of introns per gene set. (c) The number of orthogroups (shown above), and the number of genes in each category (shown below). (d) Number of protein coding genes, rRNAs, tRNAs, and the number of protein coding genes with functional annotation (PFAM, KEGG-EC, GO, SignalP 4.0 and TMHMM)

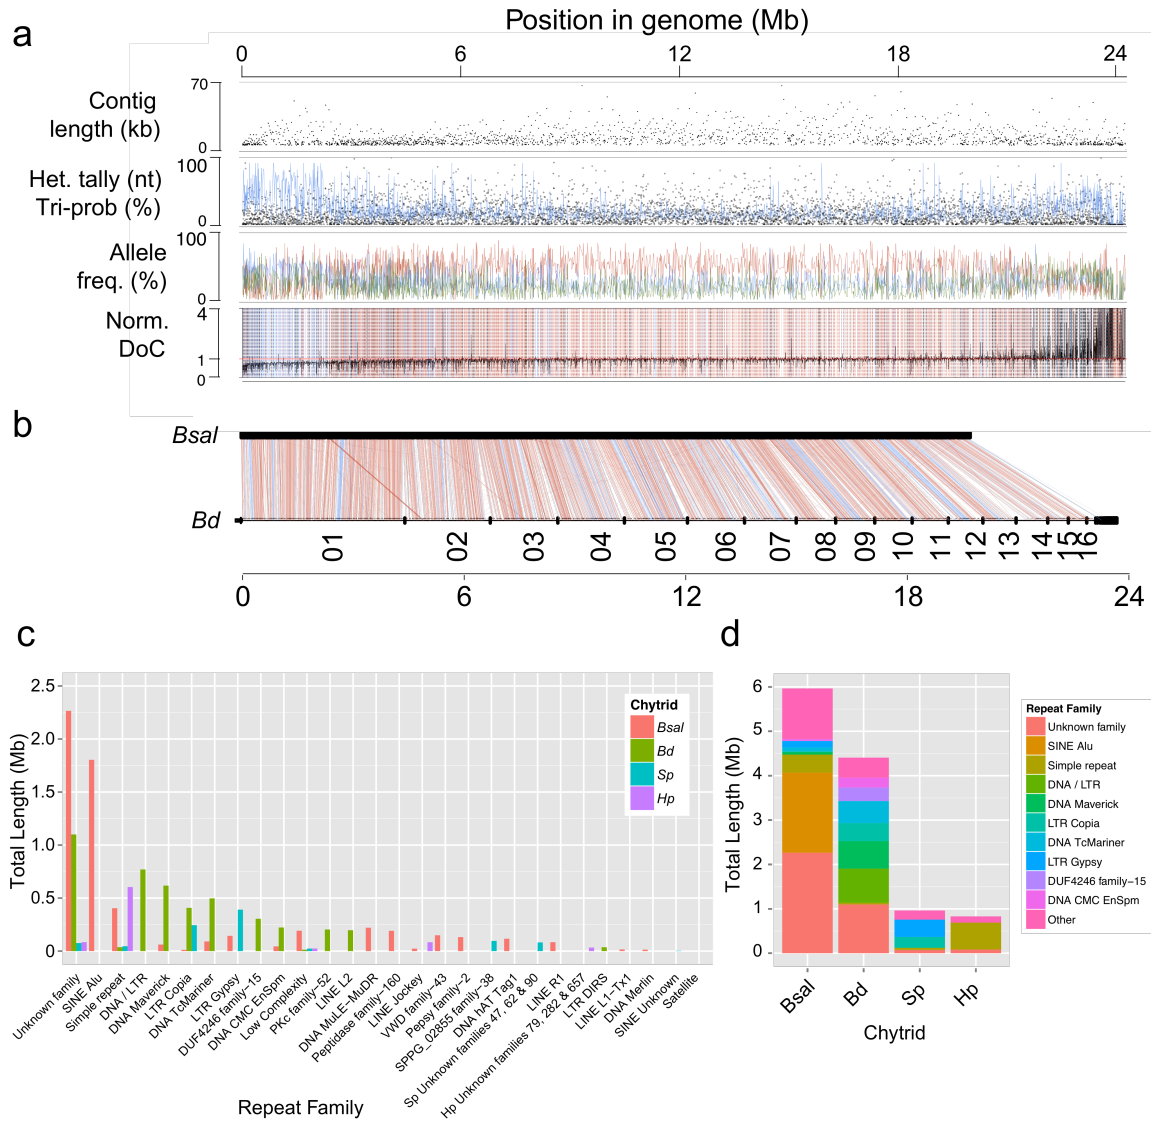

**Supplementary Figure 2 Assessments of the Chytridiomycota ploidy and repetitive content.** (a) Bi-allelic heterozygous positions in *Bsal* (shown in red) were abundant throughout the genome, indicating diploidy. *Bsal* contigs were ordered according to normalized depth of read-coverage (Norm. DoC), and plotted against (from top to bottom) 1) Contig length in kb (shown as black dots). An enrichment of very small contigs were found over those with the lowest Norm. DoC, and we therefore excluded contigs < 5 kb. 2) the number of heterozygous calls were tallied according to 5 kb non-overlapping sliding windows (tallies shown as black dots) and the percent of them that were in tri-allelic probabilities (shown as a blue line). 3) In addition to bi-allelic (red), we also had a high number of positions that appeared tri-allelic (blue) or even tetra-allelic (green) across the genome. 4) The predominant allele frequency across the lowest covered 1/8th of the genome was tri-allelic, and the remainder of the genome was bi-allelic. (b) Synteny between *Bsal* and *Bd* reveals that only sub-chromosomal regions are predominantly tri-allelic (blue) compared with longer stretches that are red (di-allelic), suggesting *Bsal* has a diploid genome. (c) Repetitive element categories per megabase (d) Repetitive element categories stacked to show total portion of repetitive genome.

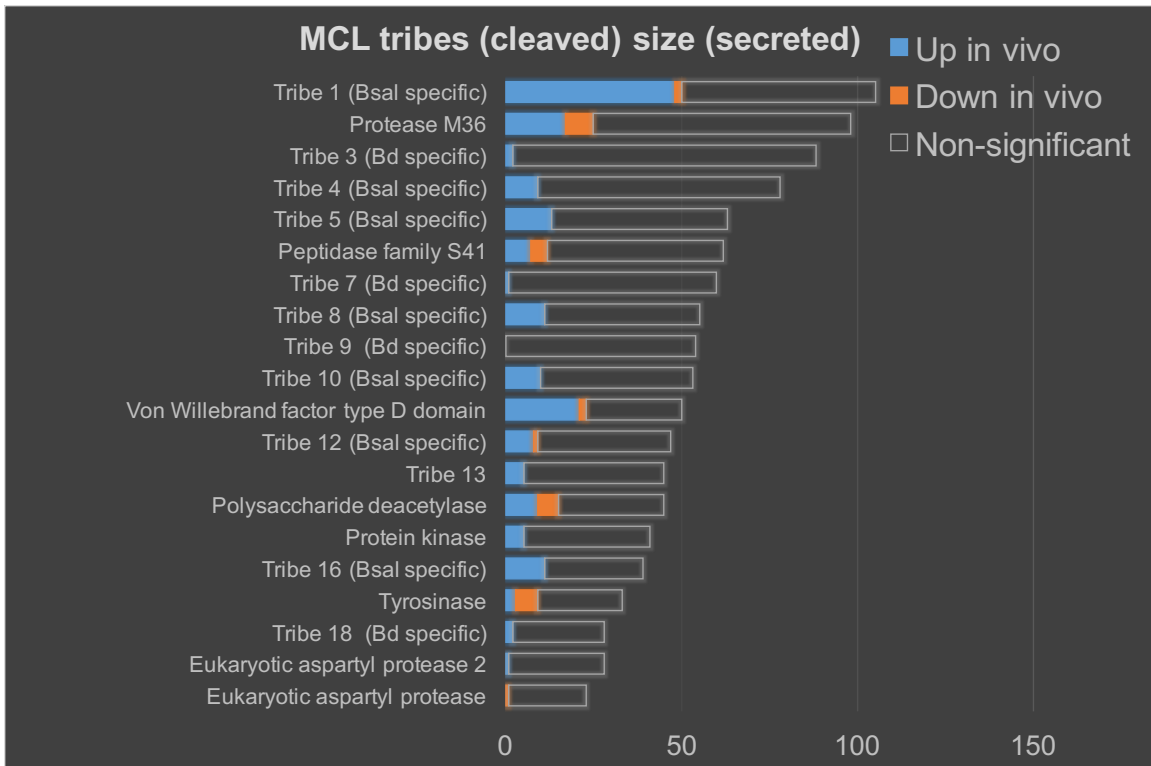

**Supplementary Figure 3. Numbers of cleaved secreted genes for *Bd*, *Bsal*, *Hp* and *Sp* clustered into Markov Cluster Algorithm (MCL) tribes.** Largest 20 tribes are shown, along with functional information or species-specificity where applicable. Colors signify significantly up- or down- regulated genes *in vivo*.

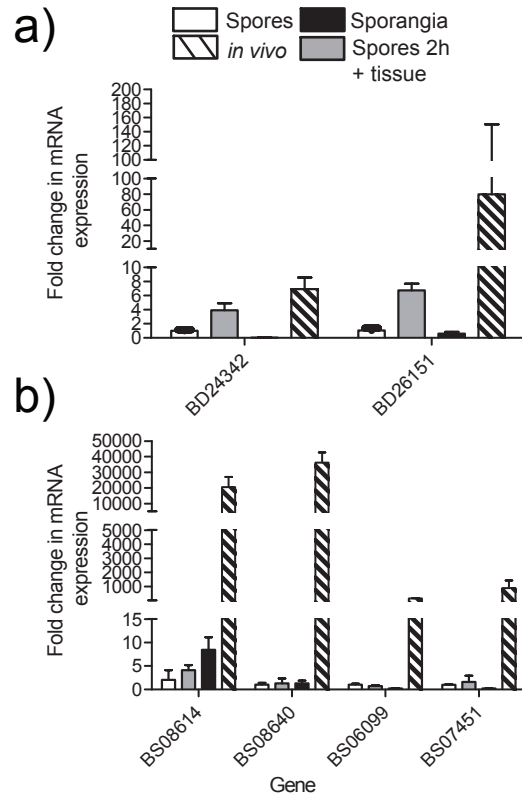

**Supplementary Figure 4. Genes from Tribe 3 (a) and Tribe 1 (b) and their expression profile in *Bd* (above) and *Bsal* (below).** Shown are the mean fold changes in mRNA expression of genes BD24342 and BD26151 in *Bd* and BS08614, BS08640, BS06099 and BS07451 in *Bsal*. The data represent the normalized target gene amount in spores that were incubated with skin tissue of *Tylotriton wenxianensis* (*Tw*) for 2 hours, 3 day old sporangia grown in TGhL, and skin tissue from chytrid-infected *Tw* animals relative to freshly collected spores which is considered 1. The results are presented as means + standard deviation. Significant differences in expression between each experimental group is shown in Table S6.



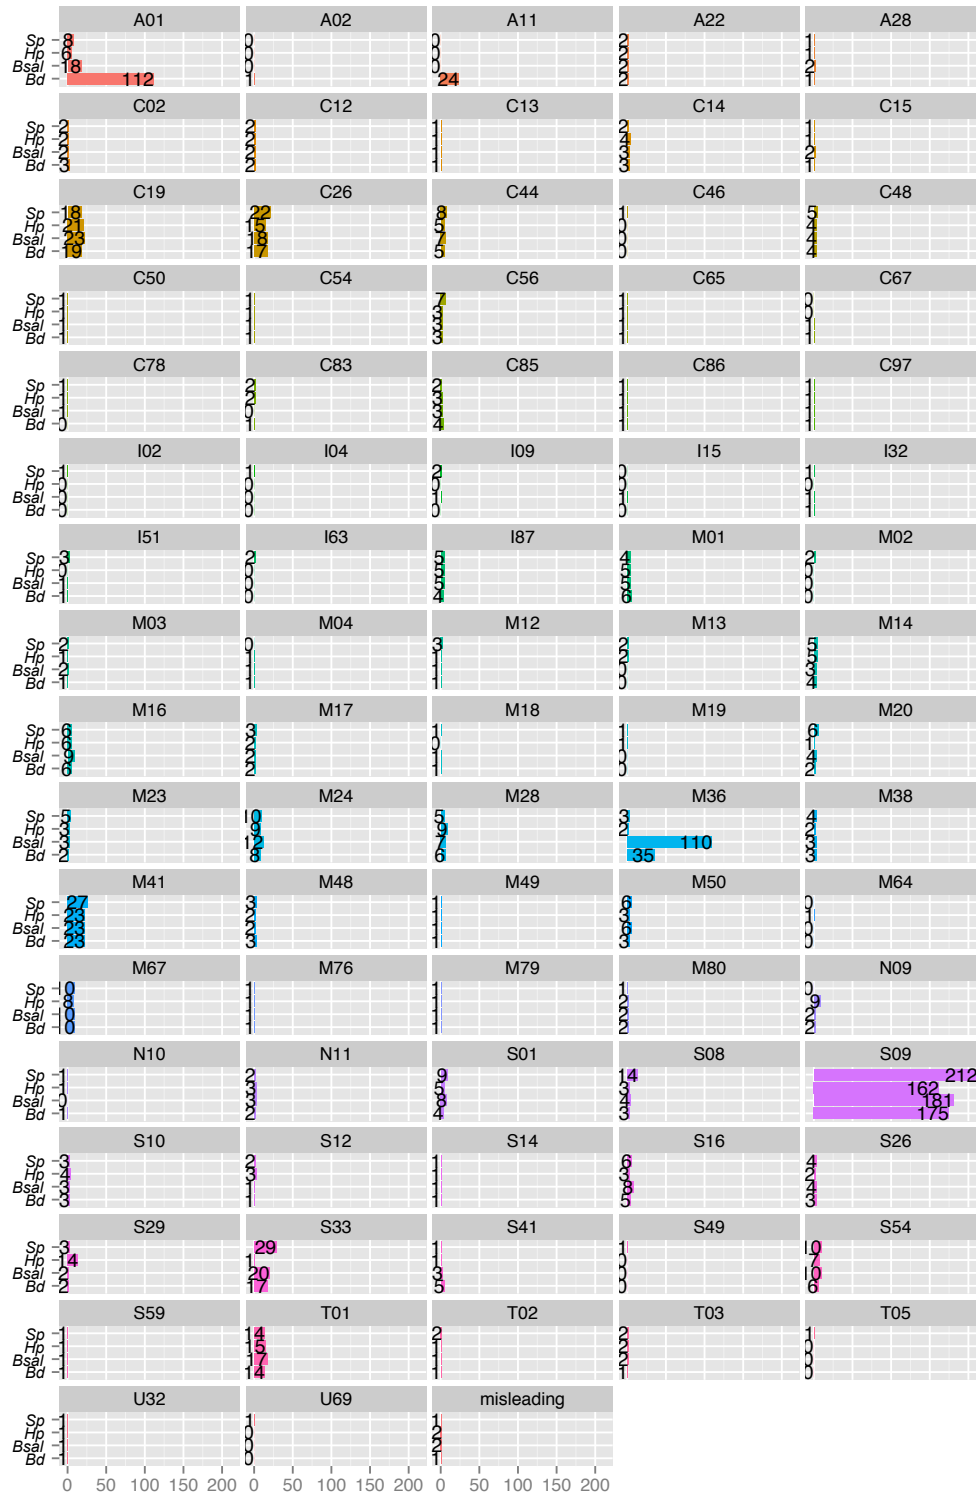

**Supplementary Figure 5. The protease composition of each chytrid was determined using top high scoring pairs (HSPs) from BLASTp searches to the MEROPS database. Expansions of A01, and M36 were most noticeable in *Bd*, while expansions of M36 in *Bsal* were ~3X compared with the number in *Bd*.**

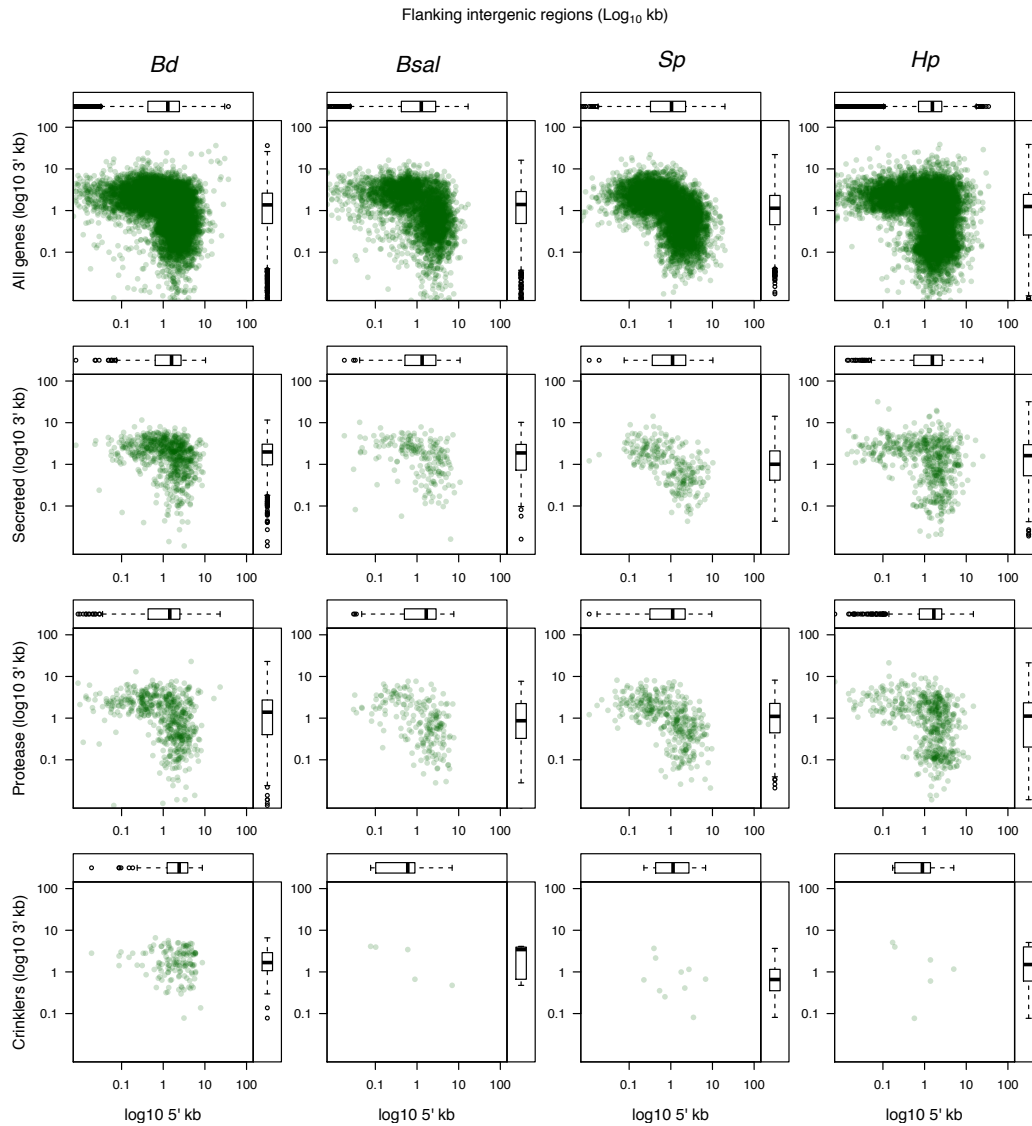

**Supplementary Figure 6. Heat map showing the flanking intergenic regions (Log<sub>10</sub> kb) for *Bd*, *Bsal*, *Sp* and *Hp* for four gene-subsets (all, secreted, proteases, crinklers). The x-axis shows the 5' upstream distance to the flanking gene, and the y-axis shows the 3' upstream distance to the flanking gene. Boxplots along the x-axis and y-axis for each gene set further summarize these values. Crinklers in *Bd* have longer intergenic regions compared with the other 3 categories.**

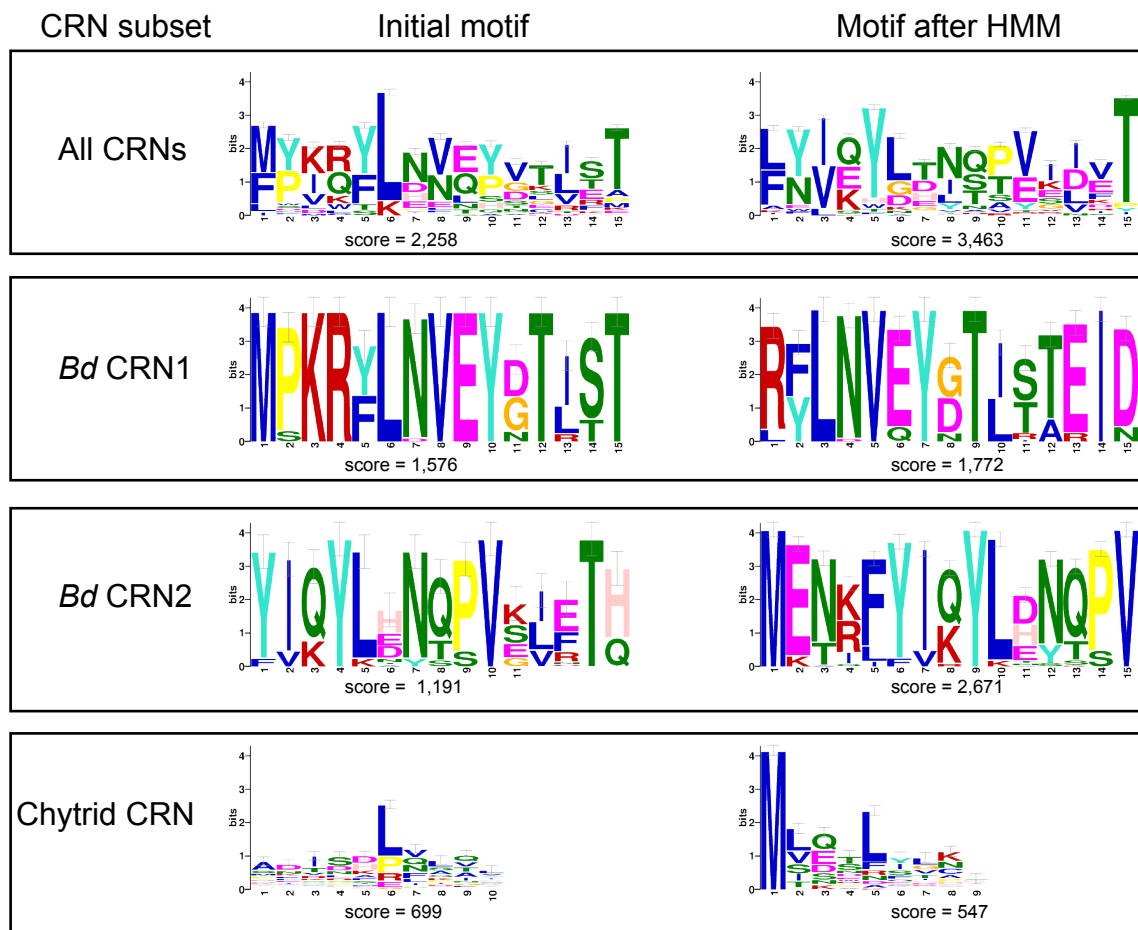

**Supplementary Figure 7. Crinkler genes from *Bd* were screened for over-represented sequences using GLAM2.** Crinklers frequently had 1 of 2 domains (CRN1 and CR2), which were manually split from the remaining CRNs that spanned all four chytrids (Chytrid CRN). These sequences were used to inform a hidden markov model (HMM), which we used to search for additional unidentified genes from the gene-sets, after which, new HMM were constructed. Each iteration achieved a slightly higher score.

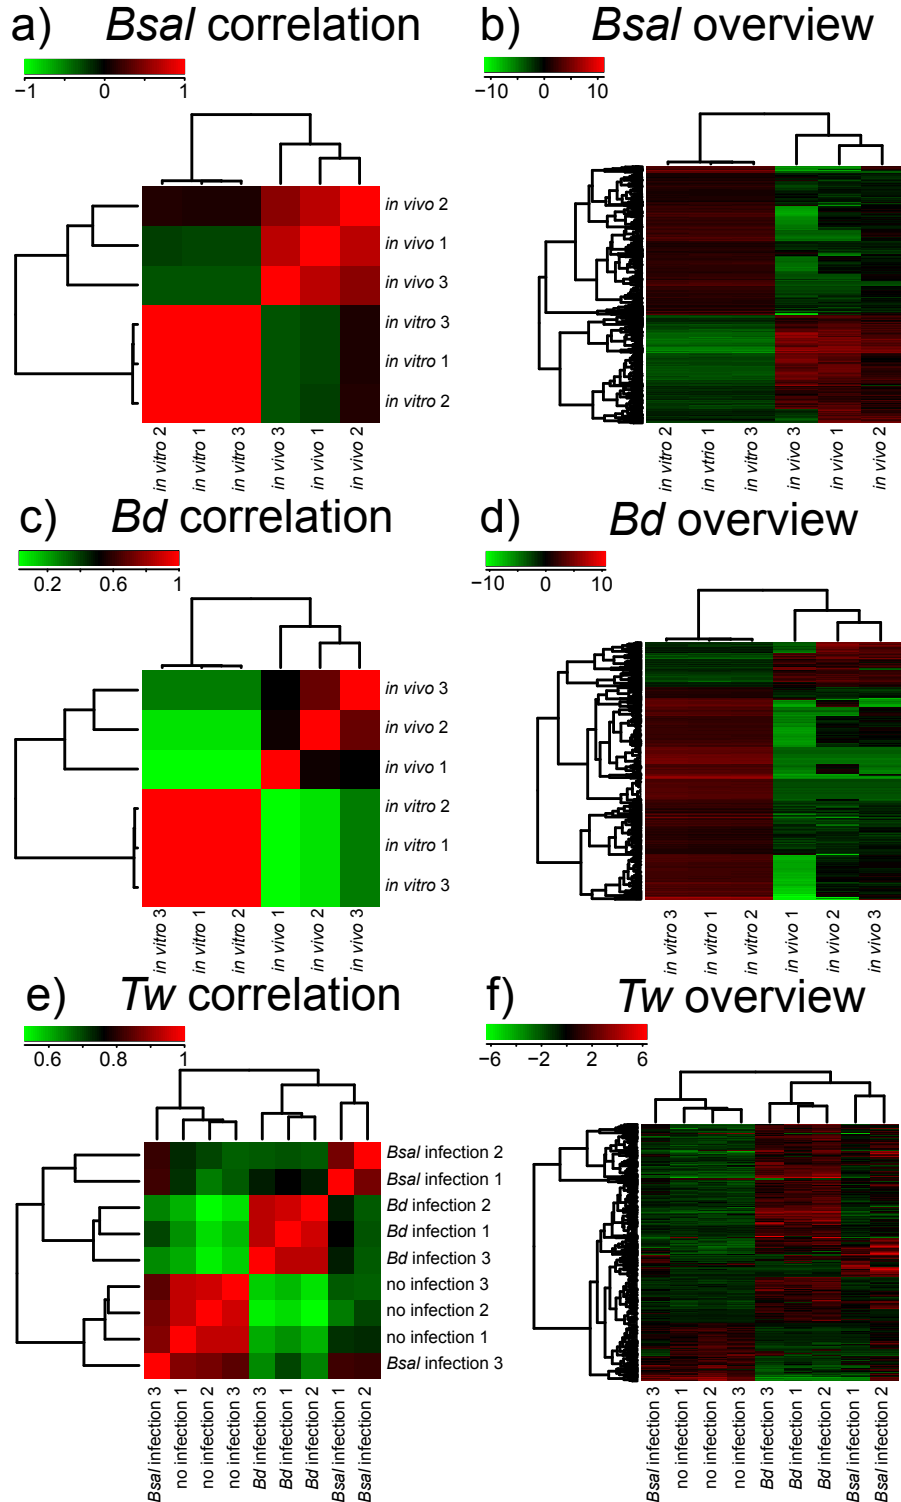

**Supplementary Figure 8.** The correlation of expression values between replicates and conditions of *Bsal* (a), *Bd* (c) and *Tw* (e) and an overview of all expression values for all differentially expressed genes in *Bsal* (b), *Bd* (d) and *Tw* (f). Trees indicate hierarchical clustering between datasets (above) and genes (left of heatmap).

## Supplementary Tables

**Supplementary Table 1. Details of genomic DNA and RNA from *Bd*, *Bsal* and *Tw* using 17 lanes of paired-end Illumina HiSeq and Illumina MiSeq.** For the *Bsal* assembly, we sequenced to 182X depth, complementing with 868X deep transcriptome sequencing for guided gene-prediction. For the *Bden* assembly, a total of 12.5X Sanger sequence from 4 kb plasmid, 10 kb plasmid, and 40 kb Fosmid genomic clones is available in the Trace archive (center\_project G888). For differential expression analysis of host and pathogens, we generated 780-1,224X depth of sequence.

| Dataset adaptors or name            | Dataset description                 | Sequencing description             | Estimated depth (X) | Genbank accession |
|-------------------------------------|-------------------------------------|------------------------------------|---------------------|-------------------|
| CGATGT_L005                         | <i>Bsal in vitro</i> DNA            | 29,503,468 paired-end HiSeq reads  | 182.6               | PRJNA311566       |
| 23_S23_L001                         | <i>Bsal in vitro</i> DNA            | 5,895,159 paired-end MiSeq reads   | 80.3                | PRJNA311566       |
| GCCAAT_L007+CGATGT_L008+ATGTCA_L007 | <i>Bsal in vitro</i> RNA (3 rep.)   | 78,103,411 paired-end HiSeq reads  | 868.9               | PRJNA326249       |
| ACAGTG_L007+TGACCA_L008+CTTGTA_L007 | <i>Bd in vitro</i> RNA (3 rep.)     | 50,374,154 paired-end HiSeq reads  | 434.8               | PRJNA326253       |
| G89283+G89284+G89285                | <i>Tw+Bd</i> infection RNA (3 rep.) | 210,886,846 paired-end HiSeq reads | 783.6*              | PRJNA300849       |
| G89280+G89281+G89282                | <i>Tw+Bs</i> infection RNA (3 rep.) | 235,040,547 paired-end HiSeq reads | 829.1               | PRJNA300849       |
| G89277+G89278+G89279                | <i>Tw in vitro</i> RNA (3 rep.)     | 240,725,021 paired-end HiSeq reads | 1224                | PRJNA300849       |

**Supplementary Table 2. Genes and transcripts were predicted for *Bsal*, *Bd*, *Sp* and *Hp*.** *Bsal* had a greater number of genes and transcripts, although a decrease in the proportion of spliced transcripts. *Bd* and *Bsal* had a similar mean number of exons per gene ( $n \sim 4.7$ ), fewer than *Hp* ( $n=5$ ) or *Sp* ( $n=6$ ).

|                                | <i>Bsal</i> | <i>Bd</i> | <i>Sp</i> | <i>Hp</i> |
|--------------------------------|-------------|-----------|-----------|-----------|
| <b>genes #</b>                 | 10,138      | 8,644     | 8,952     | 6,254     |
| <b>transcripts #</b>           | 12,474      | 9,893     | 9,424     | 6,254     |
| <b>spliced #</b>               | 9,875       | 8,940     | 8,322     | 5,347     |
| <b>unspliced #</b>             | 2,599       | 953       | 1,102     | 907       |
| <b>spliced transcripts (%)</b> | 79.16       | 90.37     | 88.31     | 85.50     |
| <b>exons #</b>                 | 58,251      | 47,046    | 56,727    | 31,341    |
| <b>introns #</b>               | 45,777      | 37,153    | 47,303    | 25,087    |
| <b>Exons per gene #</b>        | 4.67        | 4.76      | 6.02      | 5.01      |

**Supplementary Table 3. Genes from each of the four chytrids ( $n=33,974$ ) were compared, and their orthogroups identified ( $n=13,056$ ).** The most abundant category (26%) was 1:1 orthologs between all four chytrids. A large number of genes were also unique to a species, or uniquely missing from one or more species.

| Type                                               | Clusters     | Genes in All 4 chytrids | Genes in <i>Sp</i> | Genes in <i>Bsal</i> | Genes in <i>Bd</i> | Genes in <i>Hp</i> |
|----------------------------------------------------|--------------|-------------------------|--------------------|----------------------|--------------------|--------------------|
| missing in <i>Bd</i>                               | 160          | 498                     | 167                | 167                  | 0                  | 164                |
| missing in <i>Bd</i> and <i>Bsal</i>               | 155          | 379                     | 221                | 0                    | 0                  | 158                |
| missing in <i>Bd</i> and <i>Bsal</i> and <i>Hp</i> | 2884         | 3343                    | 3343               | 0                    | 0                  | 0                  |
| missing in <i>Bd</i> and <i>Bsal</i> and <i>Sp</i> | 983          | 1028                    | 0                  | 0                    | 0                  | 1028               |
| missing in <i>Bd</i> and <i>Hp</i>                 | 98           | 239                     | 138                | 101                  | 0                  | 0                  |
| missing in <i>Bd</i> and <i>Hp</i> and <i>Sp</i>   | 1866         | 3300                    | 0                  | 3300                 | 0                  | 0                  |
| missing in <i>Bd</i> and <i>Sp</i>                 | 75           | 242                     | 0                  | 167                  | 0                  | 75                 |
| missing in <i>Bsal</i>                             | 95           | 330                     | 102                | 0                    | 127                | 101                |
| missing in <i>Bsal</i> and <i>Hp</i>               | 34           | 77                      | 41                 | 0                    | 36                 | 0                  |
| missing in <i>Bsal</i> and <i>Hp</i> and <i>Sp</i> | 935          | 1989                    | 0                  | 0                    | 1989               | 0                  |
| missing in <i>Bsal</i> and <i>Sp</i>               | 65           | 211                     | 0                  | 0                    | 134                | 77                 |
| missing in <i>Hp</i>                               | 730          | 2428                    | 812                | 821                  | 795                | 0                  |
| missing in <i>Hp</i> and <i>Sp</i>                 | 542          | 1356                    | 0                  | 671                  | 685                | 0                  |
| missing in <i>Sp</i>                               | 549          | 1820                    | 0                  | 612                  | 592                | 616                |
| 1:1 orthologs                                      | 3378         | 13512                   | 3378               | 3378                 | 3378               | 3378               |
| paralog in <i>Bd</i>                               | 70           | 370                     | 70                 | 70                   | 160                | 70                 |
| paralog in <i>Bd</i> and <i>Bsal</i>               | 37           | 347                     | 37                 | 79                   | 194                | 37                 |
| paralog in <i>Bd</i> and <i>Bsal</i> and <i>Hp</i> | 12           | 193                     | 12                 | 101                  | 43                 | 37                 |
| paralog in <i>Bd</i> and <i>Bsal</i> and <i>Sp</i> | 19           | 139                     | 40                 | 40                   | 40                 | 19                 |
| paralog in <i>Bd</i> and <i>Hp</i>                 | 9            | 54                      | 9                  | 9                    | 18                 | 18                 |
| paralog in <i>Bd</i> and <i>Hp</i> and <i>Sp</i>   | 4            | 29                      | 8                  | 4                    | 9                  | 8                  |
| paralog in <i>Bd</i> and <i>Sp</i>                 | 10           | 69                      | 28                 | 10                   | 21                 | 10                 |
| paralog in <i>Bsal</i>                             | 162          | 811                     | 162                | 325                  | 162                | 162                |
| paralog in <i>Bsal</i> and <i>Hp</i>               | 4            | 25                      | 4                  | 9                    | 4                  | 8                  |
| paralog in <i>Bsal</i> and <i>Hp</i> and <i>Sp</i> | 15           | 110                     | 34                 | 31                   | 15                 | 30                 |
| paralog in <i>Bsal</i> and <i>Sp</i>               | 16           | 97                      | 33                 | 32                   | 16                 | 16                 |
| paralog in <i>Hp</i>                               | 36           | 182                     | 36                 | 36                   | 36                 | 74                 |
| paralog in <i>Hp</i> and <i>Sp</i>                 | 7            | 43                      | 15                 | 7                    | 7                  | 14                 |
| paralog in <i>Sp</i>                               | 83           | 431                     | 182                | 83                   | 83                 | 83                 |
| paralog in all                                     | 23           | 322                     | 80                 | 85                   | 86                 | 71                 |
| <b>SUM</b>                                         | <b>13056</b> | <b>33974</b>            | <b>8952</b>        | <b>10138</b>         | <b>8630</b>        | <b>6254</b>        |

**Supplementary Table 4.** Two-tailed Fisher's exact test with  $q$ -value FDR for PFAM domains enriched in the orthogroups unique to *Bd* and *Bsal*

| Pfam domain                                                                   | <i>Bsal</i> + <i>Bden</i><br>count | Other<br>count | fisher p-<br>value | q-value<br>FDR |
|-------------------------------------------------------------------------------|------------------------------------|----------------|--------------------|----------------|
| PF00665.21 Integrase core domain                                              | 19                                 | 10             | 2.23E-19           | 6.86E-16       |
| PF01522.16 Polysaccharide deacetylase                                         | 23                                 | 27             | 2.02E-18           | 3.12E-15       |
| PF05699.9 hAT family C-terminal dimerisation region                           | 9                                  | 4              | 4.10E-10           | 4.21E-07       |
| PF00187.14 Chitin recognition protein                                         | 10                                 | 8              | 9.38E-10           | 7.22E-07       |
| PF00264.15 Common central domain of tyrosinase                                | 11                                 | 17             | 1.40E-08           | 8.60E-06       |
| PF12767.2 Transcriptional regulator of RNA polIII, SAGA, subunit              | 5                                  | 0              | 1.76E-07           | 9.06E-05       |
| PF00096.21 Zinc finger, C2H2 type                                             | 14                                 | 45             | 2.25E-07           | 9.92E-05       |
| PF04674.7 Phosphate-induced protein 1 conserved region                        | 7                                  | 7              | 9.02E-07           | 3.47E-04       |
| PF03732.12 Retrotransposon gag protein                                        | 4                                  | 0              | 3.97E-06           | 1.22E-03       |
| PF12776.2 Myb/SANT-like DNA-binding domain                                    | 4                                  | 0              | 3.97E-06           | 1.22E-03       |
| PF01393.14 Chromo shadow domain                                               | 5                                  | 3              | 8.82E-06           | 2.27E-03       |
| PF14543.1 Xylanase inhibitor N-terminal                                       | 5                                  | 3              | 8.82E-06           | 2.27E-03       |
| PF00188.21 Cysteine-rich secretory protein family                             | 7                                  | 15             | 3.28E-05           | 7.76E-03       |
| PF00335.15 Tetraspanin family                                                 | 5                                  | 5              | 3.68E-05           | 8.10E-03       |
| PF02265.1 S1/P1 Nuclease                                                      | 6                                  | 10             | 4.26E-05           | 8.75E-03       |
| PF00615.14 Regulator of G protein signaling domain                            | 8                                  | 23             | 4.83E-05           | 9.31E-03       |
| PF00503.15 G-protein alpha subunit                                            | 7                                  | 17             | 6.15E-05           | 1.11E-02       |
| PF00444.13 Ribosomal protein L36                                              | 3                                  | 0              | 8.92E-05           | 1.19E-02       |
| PF01315.17 Aldehyde oxidase and xanthine dehydrogenase, a/b hammerhead domain | 3                                  | 0              | 8.92E-05           | 1.19E-02       |
| PF02892.10 BED zinc finger                                                    | 3                                  | 0              | 8.92E-05           | 1.19E-02       |
| PF03450.12 CO dehydrogenase flavoprotein C-terminal domain                    | 3                                  | 0              | 8.92E-05           | 1.19E-02       |
| PF06390.7 Neuroendocrine-specific golgi protein P55 (NESP55)                  | 3                                  | 0              | 8.92E-05           | 1.19E-02       |
| PF14372.1 Domain of unknown function (DUF4413)                                | 3                                  | 0              | 8.92E-05           | 1.19E-02       |
| PF13465.1 Zinc-finger double domain                                           | 9                                  | 34             | 9.71E-05           | 1.25E-02       |
| PF00067.17 Cytochrome P450                                                    | 6                                  | 16             | 3.16E-04           | 3.89E-02       |

**Supplementary Table 5. List of the M36 genes and their categories in each chytrid.**

| <i>Bsal</i> G1M36 | <i>Bsal</i> G2M36 | <i>Bd</i> G1M36 | Chytrid Conserved |
|-------------------|-------------------|-----------------|-------------------|
| BS_00574          | BS_01185          | BDEG_20379      | BDEG_22774        |
| BS_01765          | BS_04588          | BDEG_20405      | BDEG_22775        |
| BS_02529          | BS_05326          | BDEG_21659      | BDEG_23332        |
| BS_03474          | BS_05417          | BDEG_22285      | BDEG_24855        |
| BS_04080          | BS_05418          | BDEG_23049      | BDEG_25147        |
| BS_04296          | BS_06029          | BDEG_23209      | BDEG_28447        |
| BS_04381          | BS_06539          | BDEG_23812      | BS_00669          |
| BS_04580          | BS_06629          | BDEG_23816      | BS_02495          |
| BS_05919          | BS_06630          | BDEG_23888      | BS_05830          |
| BS_05933          | BS_06778          | BDEG_24460      | BS_07719          |
| BS_05934          | BS_07154          | BDEG_24587      | Hp_00506          |
| BS_06103          | BS_07519          | BDEG_24892      | Hp_0229           |
| BS_06223          | BS_07596          | BDEG_25168      | SPPG_01665        |
| BS_06699          | BS_07600          | BDEG_25206      | SPPG_02641        |
| BS_06708          | BS_07631          | BDEG_25536      | SPPG_04344        |
| BS_06905          | BS_07642          | BDEG_25875      |                   |
| BS_07250          | BS_07775          | BDEG_25883      |                   |
| BS_07695          | BS_07805          | BDEG_25898      |                   |
| BS_08058          | BS_07997          | BDEG_27285      |                   |
| BS_08136          | BS_08134          | BDEG_27471      |                   |
| BS_08438          | BS_08194          | BDEG_27850      |                   |
| BS_08686          | BS_08285          | BDEG_27916      |                   |
| BS_08742          | BS_08289          | BDEG_27920      |                   |
| BS_08935          | BS_08364          | BDEG_27923      |                   |
| BS_08963          | BS_08381          | BDEG_27937      |                   |
| BS_09156          | BS_08396          | BDEG_28290      |                   |
| BS_09225          | BS_08444          | BDEG_28609      |                   |
| BS_09282          | BS_08522          |                 |                   |
| BS_09289          | BS_08534          |                 |                   |
| BS_09338          | BS_08610          |                 |                   |
| BS_09371          | BS_08717          |                 |                   |
| BS_09541          | BS_08732          |                 |                   |
| BS_09557          | BS_08753          |                 |                   |
| BS_09566          | BS_08767          |                 |                   |
| BS_09677          | BS_08786          |                 |                   |
| BS_09687          | BS_08816          |                 |                   |
| BS_09704          | BS_09094          |                 |                   |
| BS_09721          | BS_09097          |                 |                   |
| BS_09779          | BS_09112          |                 |                   |
| BS_09821          | BS_09203          |                 |                   |
| BS_09876          | BS_09213          |                 |                   |
| BS_09892          | BS_09520          |                 |                   |
| BS_10047          | BS_09537          |                 |                   |
| BS_10090          | BS_09558          |                 |                   |
| BS_10154          | BS_09568          |                 |                   |
|                   | BS_09612          |                 |                   |
|                   | BS_09613          |                 |                   |
|                   | BS_09672          |                 |                   |
|                   | BS_09749          |                 |                   |
|                   | BS_09805          |                 |                   |
|                   | BS_09935          |                 |                   |
|                   | BS_09972          |                 |                   |
|                   | BS_09985          |                 |                   |
|                   | BS_10015          |                 |                   |
|                   | BS_10040          |                 |                   |
|                   | BS_10079          |                 |                   |
|                   | BS_10093          |                 |                   |



**Supplementary Table 6: Gene expression for different life stages.** The numerical values shown indicate fold change  $\pm$  standard deviation in comparison with freshly collected spores. Superscript refers to a significant difference with the respective condition being “A” spores, “B” spores 2h + tissue, “C” sporangia, “D” sporangia + chitinase, and “E” *in vivo*. Gene targets included Group 1 BatraM36s (G1M36) and Group 2 BsalM36s (G2M36), Carbohydrate binding-module 18 (CBM18), Crinklers (CRN), and Tribes with unknown function (extra). A Kruskal-Wallis analysis, followed by a Dunn-Bonferroni post hoc test was performed, indicating significant changes with  $p < 0.05$ . NA indicates that the condition was not tested.

|                     |             | A: Spores                      | B: Spores 2h + tissue             | C: Sporangia                     | D: Sporangia + chitinase       | E: <i>In vivo</i>                     |
|---------------------|-------------|--------------------------------|-----------------------------------|----------------------------------|--------------------------------|---------------------------------------|
| <i>Bd</i> G1M36     | G1M_20379   | 1.01 $\pm$ 0.19 <sup>C</sup>   | 0.37 $\pm$ 0.10 <sup>E</sup>      | 0.16 $\pm$ 0.08 <sup>A,E</sup>   | NA                             | 27.36 $\pm$ 11.88 <sup>B,C</sup>      |
|                     | G1M_23888   | 1.03 $\pm$ 0.27 <sup>C</sup>   | 0.31 $\pm$ 0.16                   | 0.02 $\pm$ 0.01 <sup>A,E</sup>   | NA                             | 1.24 $\pm$ 0.50 <sup>C</sup>          |
|                     | G1M_27285   | 1.04 $\pm$ 0.32 <sup>B</sup>   | 0.01 $\pm$ 0.00 <sup>A,E</sup>    | 0.02 $\pm$ 0.01 <sup>E</sup>     | NA                             | 3.43 $\pm$ 2.61 <sup>B,C</sup>        |
|                     | G1M_25206   | 1.28 $\pm$ 1.06                | 2.94 $\pm$ 1.27 <sup>C</sup>      | 0.26 $\pm$ 0.14 <sup>B,E</sup>   | NA                             | 12.52 $\pm$ 11.93 <sup>C</sup>        |
|                     | G1M_22285   | 1.01 $\pm$ 0.17                | 0.63 $\pm$ 0.19 <sup>E</sup>      | 0.60 $\pm$ 0.15 <sup>E</sup>     | NA                             | 3.66 $\pm$ 1.91 <sup>B,C</sup>        |
| <i>Bsal</i> G1M/G2M | G2M_08289   | 1.03 $\pm$ 0.27 <sup>C</sup>   | 0.25 $\pm$ 0.07 <sup>E</sup>      | 0.01 $\pm$ 0.00 <sup>A,E</sup>   | NA                             | 5.17 $\pm$ 3.29 <sup>B,C</sup>        |
|                     | G2M_08767   | 1.23 $\pm$ 0.74 <sup>E</sup>   | 3.96 $\pm$ 2.89                   | 1.65 $\pm$ 0.64 <sup>E</sup>     | NA                             | 200.53 $\pm$ 69.69 <sup>A,C</sup>     |
|                     | G2M_08444   | 1.04 $\pm$ 0.32                | 0.15 $\pm$ 0.05 <sup>E</sup>      | 0.09 $\pm$ 0.05 <sup>E</sup>     | NA                             | 111.16 $\pm$ 46.85 <sup>B,C</sup>     |
|                     | G1M_06223   | 1.06 $\pm$ 0.41 <sup>C</sup>   | 12.17 $\pm$ 1.59 <sup>E</sup>     | 29.71 $\pm$ 24.37 <sup>A,E</sup> | NA                             | 0.95 $\pm$ 0.32 <sup>B,C</sup>        |
|                     | G1M_04381   | 1.34 $\pm$ 1.18 <sup>E</sup>   | 2.16 $\pm$ 0.85                   | 1.28 $\pm$ 0.38 <sup>E</sup>     | NA                             | 2099.07 $\pm$ 914.56 <sup>A,C</sup>   |
| <i>Bd</i> CBM18     | CBM18_20255 | 1.01 $\pm$ 0.13 <sup>C,D</sup> | 1.69 $\pm$ 0.43 <sup>C,D</sup>    | 0.02 $\pm$ 0.00 <sup>A,B</sup>   | 0.02 $\pm$ 0.01 <sup>A,B</sup> | 0.48 $\pm$ 0.15                       |
|                     | CBM18_28751 | 1.17 $\pm$ 0.69 <sup>B</sup>   | 0.09 $\pm$ 0.14 <sup>A,E</sup>    | 0.18 $\pm$ 0.09 <sup>E</sup>     | 0.24 $\pm$ 0.14 <sup>E</sup>   | 15.77 $\pm$ 7.88 <sup>B,C,D</sup>     |
|                     | CBM18_26087 | 1.43 $\pm$ 1.53 <sup>B,E</sup> | 14.06 $\pm$ 4.91 <sup>A,C,D</sup> | 1.72 $\pm$ 0.36 <sup>B</sup>     | 2.11 $\pm$ 0.79 <sup>B</sup>   | 7.13 $\pm$ 1.12 <sup>A</sup>          |
| <i>Bsal</i> CBM18   | CBM18_04331 | 1.08 $\pm$ 0.43                | 1.87 $\pm$ 0.56 <sup>D</sup>      | 0.19 $\pm$ 0.06 <sup>E</sup>     | 0.18 $\pm$ 0.07 <sup>B,E</sup> | 37.56 $\pm$ 9.07 <sup>C,D</sup>       |
|                     | CBM18_07447 | 1.01 $\pm$ 0.11 <sup>E</sup>   | 4.03 $\pm$ 1.13 <sup>D</sup>      | 1.20 $\pm$ 0.35                  | 0.41 $\pm$ 0.11 <sup>B,E</sup> | 159.13 $\pm$ 84.22 <sup>A,D</sup>     |
|                     | CBM18_08642 | 1.01 $\pm$ 0.15 <sup>C,D</sup> | 1.70 $\pm$ 0.32                   | 4.04 $\pm$ 1.24 <sup>A,E</sup>   | 4.20 $\pm$ 0.78 <sup>A,E</sup> | 0.15 $\pm$ 0.16 <sup>C,D</sup>        |
| <i>Bd</i> CRN       | CRN_23176   | 1.01 $\pm$ 0.16 <sup>C</sup>   | 20.98 $\pm$ 1.72 <sup>C,E</sup>   | 0.05 $\pm$ 0.02 <sup>A,B</sup>   | NA                             | 0.10 $\pm$ 0.03 <sup>B</sup>          |
|                     | CRN_25085   | 1.02 $\pm$ 0.21 <sup>C</sup>   | 8.14 $\pm$ 1.08 <sup>C,E</sup>    | 0.03 $\pm$ 0.02 <sup>A,B</sup>   | NA                             | 0.17 $\pm$ 0.15 <sup>B</sup>          |
|                     | CRN_22492   | 1.04 $\pm$ 0.28 <sup>C</sup>   | 6.73 $\pm$ 0.94 <sup>C,E</sup>    | 0.02 $\pm$ 0.02 <sup>A,B</sup>   | NA                             | 0.12 $\pm$ 0.07 <sup>B</sup>          |
| <i>Bsal</i> CRN     | CRN_00955   | 1.03 $\pm$ 0.27 <sup>C,E</sup> | 0.19 $\pm$ 0.09 <sup>C</sup>      | 0.00 $\pm$ 0.00 <sup>A,B</sup>   | NA                             | 0.02 $\pm$ 0.00 <sup>A</sup>          |
|                     | CRN_06851   | 1.01 $\pm$ 0.14 <sup>C,E</sup> | 0.22 $\pm$ 0.08 <sup>C</sup>      | 0.00 $\pm$ 0.00 <sup>A,B</sup>   | NA                             | 0.06 $\pm$ 0.03 <sup>A</sup>          |
| <i>Bd</i> extra     | BD_24342    | 1.01 $\pm$ 0.13 <sup>E</sup>   | 3.93 $\pm$ 0.98 <sup>C</sup>      | 0.04 $\pm$ 0.04 <sup>B,E</sup>   | NA                             | 6.91 $\pm$ 1.65 <sup>A,C</sup>        |
|                     | BD_26151    | 1.05 $\pm$ 0.34 <sup>E</sup>   | 6.75 $\pm$ 0.94 <sup>C</sup>      | 0.61 $\pm$ 0.22 <sup>B,E</sup>   | NA                             | 79.67 $\pm$ 70.73 <sup>A,C</sup>      |
| <i>Bsal</i> extra   | BS_08614    | 2.07 $\pm$ 2.04 <sup>E</sup>   | 4.15 $\pm$ 1.06 <sup>E</sup>      | 8.47 $\pm$ 2.65                  | NA                             | 20578.81 $\pm$ 6426.80 <sup>A,B</sup> |
|                     | BS_08640    | 1.04 $\pm$ 0.34 <sup>E</sup>   | 1.30 $\pm$ 1.04 <sup>E</sup>      | 1.31 $\pm$ 0.56                  | NA                             | 36140.74 $\pm$ 6524.31 <sup>A,B</sup> |
|                     | BS_06099    | 1.02 $\pm$ 0.20 <sup>C</sup>   | 0.74 $\pm$ 0.19 <sup>E</sup>      | 0.18 $\pm$ 0.08 <sup>A,E</sup>   | NA                             | 148.43 $\pm$ 39.01 <sup>B,C</sup>     |
|                     | BS_07451    | 1.01 $\pm$ 0.13                | 1.62 $\pm$ 1.33                   | 0.19 $\pm$ 0.06 <sup>E</sup>     | NA                             | 888.55 $\pm$ 547.44 <sup>C</sup>      |

**Supplementary Table 7. Two-tailed *t*-tests were calculated on 5' and 3' intergenic distances of genes split between the four chytrids, and further separated secreted, proteases, and crinklers. Green highlighting signifies  $p < 0.0001$ .**

| 5' log10         |               |                 |               |               |               |               |                |                 |                 |                  |               |               |                |               |               |
|------------------|---------------|-----------------|---------------|---------------|---------------|---------------|----------------|-----------------|-----------------|------------------|---------------|---------------|----------------|---------------|---------------|
|                  | Full set (Bd) | Full set (bsal) | Full set (Sp) | Full set (Hp) | secreted (Bd) | protease (Bd) | crinklers (Bd) | secreted (Bsal) | protease (Bsal) | crinklers (Bsal) | secreted (Sp) | protease (Sp) | crinklers (Sp) | secreted (Hp) | protease (Hp) |
| Full set (Bd)    |               |                 |               |               |               |               |                |                 |                 |                  |               |               |                |               |               |
| Full set (bsal)  | 0.535         |                 |               |               |               |               |                |                 |                 |                  |               |               |                |               |               |
| Full set (Sp)    | 3.67E-08      | 0.0003597       |               |               |               |               |                |                 |                 |                  |               |               |                |               |               |
| Full set (Hp)    | 1.18E-15      | 1.94E-10        | < 2.2e-16     |               |               |               |                |                 |                 |                  |               |               |                |               |               |
| secreted (bd)    | 4.76E-07      | 6.01E-07        | 7.15E-14      | 0.1204        |               |               |                |                 |                 |                  |               |               |                |               |               |
| protease (bd)    | 0.6664        | 0.491           | 0.01317       | 0.02185       | 0.004119      |               |                |                 |                 |                  |               |               |                |               |               |
| crinklers (bd)   | 2.57E-14      | 1.71E-14        | < 2.2e-16     | 1.16E-09      | 8.85E-07      | 7.49E-11      |                |                 |                 |                  |               |               |                |               |               |
| secreted (Bsal)  | 0.8257        | 0.7105          | 0.1855        | 0.2183        | 0.07953       | 0.9932        | 1.20E-06       |                 |                 |                  |               |               |                |               |               |
| protease (Bsal)  | 0.1394        | 0.1029          | 0.005187      | 0.7729        | 0.3295        | 0.305         | 4.44E-06       | 0.4367          |                 |                  |               |               |                |               |               |
| crinklers (Bsal) | 0.4651        | 0.476           | 0.5466        | 0.3733        | 0.3382        | 0.45          | 0.1732         | 0.4522          | 0.3884          |                  |               |               |                |               |               |
| secreted (Sp)    | 0.4664        | 0.62            | 0.4163        | 0.006259      | 0.001281      | 0.3898        | 8.20E-11       | 0.5414          | 0.1061          | 0.5033           |               |               |                |               |               |
| protease (Sp)    | 0.04966       | 0.09892         | 0.853         | 2.16E-05      | 5.57E-06      | 0.06869       | 4.60E-14       | 0.2139          | 0.01635         | 0.5565           | 0.4502        |               |                |               |               |
| crinklers (Sp)   | 0.6236        | 0.5919          | 0.4169        | 0.9536        | 0.8937        | 0.6753        | 0.188          | 0.6818          | 0.8998          | 0.385            | 0.5276        | 0.4042        |                |               |               |
| secreted (Hp)    | 0.06527       | 0.04254         | 0.000132      | 0.4057        | 0.09649       | 0.2957        | 1.19E-08       | 0.4865          | 0.8245          | 0.4006           | 0.08398       | 0.005823      | 0.8482         |               |               |
| protease (Hp)    | 0.007889      | 0.005076        | 4.57E-06      | 0.977         | 0.3462        | 0.09622       | 2.01E-07       | 0.2682          | 0.7947          | 0.3729           | 0.02497       | 0.0009391     | 0.9579         | 0.5343        |               |
| crinklers (Hp)   | 0.6727        | 0.6948          | 0.835         | 0.4884        | 0.4201        | 0.6425        | 0.1407         | 0.6474          | 0.5197          | 0.6788           | 0.7492        | 0.8536        | 0.528          | 0.5432        | 0.5432        |

  

| 3' log10         |               |                 |               |               |               |               |                |                 |                 |                  |               |               |                |               |               |
|------------------|---------------|-----------------|---------------|---------------|---------------|---------------|----------------|-----------------|-----------------|------------------|---------------|---------------|----------------|---------------|---------------|
|                  | Full set (Bd) | Full set (bsal) | Full set (Sp) | Full set (Hp) | secreted (Bd) | protease (Bd) | crinklers (Bd) | secreted (Bsal) | protease (Bsal) | crinklers (Bsal) | secreted (Sp) | protease (Sp) | crinklers (Sp) | secreted (Hp) | protease (Hp) |
| Full set (Bd)    |               |                 |               |               |               |               |                |                 |                 |                  |               |               |                |               |               |
| Full set (bsal)  | 0.5586        |                 |               |               |               |               |                |                 |                 |                  |               |               |                |               |               |
| Full set (Sp)    | 2.65E-07      | 0.0012          |               |               |               |               |                |                 |                 |                  |               |               |                |               |               |
| Full set (Hp)    | < 2.2e-16     | < 2.2e-16       | 1.14E-12      |               |               |               |                |                 |                 |                  |               |               |                |               |               |
| secreted (bd)    | < 2.2e-16     | 6.55E-16        | < 2.2e-16     | < 2.2e-16     |               |               |                |                 |                 |                  |               |               |                |               |               |
| protease (bd)    | 0.3204        | 0.4941          | 0.3891        | 0.0003388     | 2.08E-09      |               |                |                 |                 |                  |               |               |                |               |               |
| crinklers (bd)   | 3.20E-10      | 2.63E-10        | 5.93E-14      | < 2.2e-16     | 0.1775        | 7.68E-09      |                |                 |                 |                  |               |               |                |               |               |
| secreted (Bsal)  | 0.003706      | 0.002606        | 4.56E-05      | 8.00E-09      | 0.2774        | 0.002495      | 0.05745        |                 |                 |                  |               |               |                |               |               |
| protease (Bsal)  | 0.000588      | 0.001238        | 0.01732       | 0.4237        | 1.81E-10      | 0.01105       | 5.83E-11       | 5.50E-06        |                 |                  |               |               |                |               |               |
| crinklers (Bsal) | 0.3432        | 0.3307          | 0.2651        | 0.1802        | 0.7466        | 0.3003        | 0.902          | 0.6115          | 0.1494          |                  |               |               |                |               |               |
| secreted (Sp)    | 0.06123       | 0.1102          | 0.7131        | 0.06486       | 2.34E-09      | 0.393         | 2.34E-09       | 0.0004965       | 0.07891         | 0.25             |               |               |                |               |               |
| protease (Sp)    | 0.01155       | 0.02817         | 0.3814        | 0.1208        | 7.66E-12      | 0.2044        | 5.14E-11       | 9.84E-05        | 0.1219          | 0.2316           | 0.7428        |               |                |               |               |
| crinklers (Sp)   | 0.1732        | 0.1855          | 0.2692        | 0.4836        | 0.03557       | 0.2234        | 0.02219        | 0.05894         | 0.6353          | 0.1183           | 0.3048        | 0.3414        |                |               |               |
| secreted (Hp)    | 0.1939        | 0.1362          | 0.002025      | 1.07E-08      | 6.01E-05      | 0.09525       | 1.78E-05       | 0.08585         | 0.0002349       | 0.4123           | 0.02029       | 0.004884      | 0.127          |               |               |
| protease (Hp)    | 1.09E-07      | 1.08E-06        | 0.0002576     | 0.2203        | < 2.2e-16     | 0.0006263     | < 2.2e-16      | 2.75E-08        | 0.9982          | 0.149            | 0.02432       | 0.04296       | 0.6285         | 7.72E-07      |               |
| crinklers (Hp)   | 0.9266        | 0.9082          | 0.8028        | 0.6316        | 0.6705        | 0.8604        | 0.5673         | 0.7816          | 0.5571          | 0.583            | 0.7741        | 0.7398        | 0.4465         | 0.9839        | 0.9839        |

**Supplementary Table 8. Trinity assemblies for the RNA-Seq data from *Tw*, *Bsal* and *Bd* combined datasets were made using Kmer depth=2 setting.** Kmer depth=1 setting was also tested, but achieved considerably shorter assembled contigs in terms of NMAX, N50 and N90. We ran TransDecoder to identify predicted reading frames from the assembly, and then used BLAT to identify *Batrachochytrium* transcripts from their respective genomes, splitting the dataset into 4 categories (*Batrachochytrium*-non-specific, *Bd* only, *Bsal* only, *Tw* only).

| Assembly and alignment metrics                                  | kmer depth=1  | kmer depth=2  |
|-----------------------------------------------------------------|---------------|---------------|
| Trinity number of sequences                                     | 732,326       | 437,048       |
| Trinity length (nt)                                             | 486,010,742   | 353,024,040   |
| Trinity NMAX:                                                   | 28,751        | 65,583        |
| Trinity N50:                                                    | 1,162         | 1,791         |
| Trinity N90:                                                    | 252           | 275           |
| TransDecoder number of sequences                                | 123,247       | 94104         |
| TransDecoder length (nt)                                        | 103,499,169   | 88802019      |
| TransDecoder NMAX:                                              | 28,749        | 65310         |
| TransDecoder N50:                                               | 1,251         | 1440          |
| TransDecoder N90:                                               | 351           | 369           |
| BLAT to <i>Bd</i> genome (nt covered from all hits)             | 5,594,034     | 2248563       |
| BLAT to <i>Bd</i> genome (nt covered from all hits over ORFs)   | 3,281,696     | 1402322       |
| BLAT to <i>Bd</i> Genes covered (by >=50)                       | 2456 (27.85%) | 1103 (12.51%) |
| BLAT to <i>Bd</i> Genes not covered                             | 6,363         | 7716          |
| BLAT to <i>Bd</i> Coverage over non-predicted ORF (number)      | 9,998         | 4145          |
| BLAT to <i>Bd</i> Coverage over non-predicted ORF (nt)          | 2,312,337     | 846241        |
| BLAT to <i>Bsal</i> genome (nt covered from all hits)           | 10,885,989    | 7855982       |
| BLAT to <i>Bsal</i> genome (nt covered from all hits over ORFs) | 7,272,260     | 5144596       |
| BLAT to <i>Bsal</i> Genes covered (by >=50)                     | 4616 (37.00%) | 3381 (27.10%) |
| BLAT to <i>Bsal</i> Genes not covered                           | 7,858         | 9093          |
| BLAT to <i>Bsal</i> Coverage over non-predicted ORF (number)    | 22,147        | 16218         |
| BLAT to <i>Bsal</i> Coverage over non-predicted ORF (nt)        | 3,613,266     | 2711049       |
| <i>Bd</i> + <i>Bsal</i> TransDecoder transcripts number         | 197           | 155           |
| <i>Bd</i> + <i>Bsal</i> TransDecoder transcripts length (nt)    | 171465        | 140892        |
| GC (%)                                                          | 47            | 48            |
| NMAX                                                            | 3894          | 3591          |
| N50                                                             | 1092          | 1218          |
| N90                                                             | 432           | 411           |
| <i>Bd</i> only TransDecoder transcripts number                  | 3163          | 1390          |
| <i>Bd</i> only TransDecoder transcripts length (nt)             | 1817508       | 796167        |
| GC (%)                                                          | 45            | 46            |
| NMAX                                                            | 5406          | 4788          |
| N50                                                             | 597           | 585           |
| N90                                                             | 336           | 333           |
| <i>Bsal</i> only TransDecoder transcripts number                | 10013         | 7438          |
| <i>Bsal</i> only TransDecoder transcripts length (nt)           | 8274402       | 5835474       |
| GC (%)                                                          | 47            | 48            |
| NMAX                                                            | 10929         | 10929         |
| N50                                                             | 1047          | 969           |
| N90                                                             | 402           | 387           |
| <i>Tw</i> (not chytrid) TransDecoder transcripts number         | 110,268       | 85121         |
| <i>Tw</i> (not chytrid) TransDecoder transcripts length (nt)    | 93578724      | 82029486      |
| GC (%)                                                          | 48            | 48            |
| NMAX                                                            | 28749         | 65310         |
| N50                                                             | 1305          | 1509          |
| N90                                                             | 348           | 369           |

**Supplementary Table 9. *Tw* gene counts that were significantly up- or down- regulated without infection (control), infected with *Bsal*, and infected with *Bd*.** Gene counts are followed by the number of PFAM and GO terms associated with those genes, and their respective enrichment as determined by Two-tailed Fisher's exact tests with *q*-value FDR.

| Experiment                   | UP/Down-regulated | Genes # | Genes with PFAM domains | Genes with GO terms | PFAM enrichment | GO enrichment |
|------------------------------|-------------------|---------|-------------------------|---------------------|-----------------|---------------|
| Tw infected with <i>Bsal</i> | upregulated       | 96      | 46                      | 31                  | 27              | 0             |
| Tw infected with <i>Bsal</i> | downregulated     | 12      | 5                       | 3                   | 4               | 0             |
| Tw infected with <i>Bd</i>   | upregulated       | 384     | 175                     | 103                 | 73              | 2             |
| Tw infected with <i>Bd</i>   | downregulated     | 106     | 48                      | 46                  | 52              | 0             |

**Supplementary Table 10: List of genes and sequences of the primers used for quantitative PCR analysis.**

| Gene                             | primer    | primer sequence (5' - 3') |
|----------------------------------|-----------|---------------------------|
| <i>Bd</i> : $\alpha$ -centractin | sense     | GCAGCATGGAGTTGTCACTG      |
|                                  | antisense | AGCTTGGTCACGATTGGAAC      |
| <i>Bd</i> : R6064                | sense     | GTCGTACTGGCAACCTCACC      |
|                                  | antisense | ACATTGGGAGCAATCTCGAC      |
| <i>Bd</i> : TEF1a                | sense     | CCTTCCCGTCCTACTGACAA      |
|                                  | antisense | GAACAGTTCGGATTCCCTCCA     |
| <i>Bd</i> : GAPDH                | sense     | AAGCCTGCCAAGTACGAAGA      |
|                                  | antisense | AAAGATGGAGCTGCGAGTGT      |
| <i>Bd</i> : G1M_20379            | sense     | CTGGTATGGACGCTCTCGTT      |
|                                  | antisense | AGACTAAGCCAGTCGCTCCA      |
| <i>Bd</i> : G1M_23888            | sense     | CACCCAACGAGTTCAAGGTT      |
|                                  | antisense | GCCGTCTTGGATATGGACAG      |
| <i>Bd</i> : G1M_27285            | sense     | GCAGATGGTCAACCTGGAGT      |
|                                  | antisense | CCACTGTCTCGATTCCGGATT     |
| <i>Bd</i> : G1M_25206            | sense     | GGTCTTGACAGCCAAATCGT      |
|                                  | antisense | CTCTAGCCTCACCCTCGAAC      |
| <i>Bd</i> : G1M_22285            | sense     | GGTGTCTCAGGTCGGTTGAC      |
|                                  | antisense | GATTCCTTGGCAGACACGAT      |
| <i>Bd</i> : CBM18_20255          | sense     | ATCTTGCTTGACACCCGAAG      |
|                                  | antisense | GTGACTTGGCTGATGCCTTT      |
| <i>Bd</i> : CBM18_28751          | sense     | CGTGTGGACGTCGATACAAC      |
|                                  | antisense | CATCCAACACTGCAATGAGC      |
| <i>Bd</i> : CBM18_26087          | sense     | TCGTGAACTAACGCAACAGC      |
|                                  | antisense | CAGACGGTACTTGACGCAGA      |
| <i>Bd</i> : BDEG_24342           | sense     | CCGGCTACAAGCTTGTGAGA      |
|                                  | antisense | GTGTTGGATCCAGGACCCTG      |
| <i>Bd</i> : BDEG_26151           | sense     | CAGCTGATGAAGATGGCTCA      |
|                                  | antisense | GGTTCGTTAGTCGGGACAGA      |
| <i>Bd</i> : CRN_23176            | sense     | AAACGCCCTTCGCTTCGATA      |

|                                    |           |                          |
|------------------------------------|-----------|--------------------------|
|                                    | antisense | TCTTTCTCCAAGCTGAGCGG     |
| <i>Bd</i> : CRN_25085              | sense     | CTCCCGGTTTCGACATCACAA    |
|                                    | antisense | GAACAGCGAACCACAGCTTG     |
| <i>Bd</i> : CRN_22492              | sense     | CTCCCGGTTTCGACATCACAA    |
|                                    | antisense | GAACAGCGAACCACAGCTTG     |
| <i>Bsal</i> : $\alpha$ -centractin | sense     | CCGGCTACCATTTTCATACG     |
|                                    | antisense | CGATCGATGGGTAGCACTCT     |
| <i>Bsal</i> : R6064                | sense     | GTTGCCAAGTCTGCTGTGAA     |
|                                    | antisense | ATCAAGCGAGGGTGCAGAC      |
| <i>Bsal</i> : TEF1a                | sense     | TCCCACTGACAAACCTCTCC     |
|                                    | antisense | CGACAGGTACTGTTCCAATACCAC |
| <i>Bsal</i> : GAPDH                | sense     | GCCAGCAAATACGAGGAGA      |
|                                    | antisense | CCATTTCATGGGTCCATTAGC    |
| <i>Bsal</i> : G2M_08289            | sense     | GTCATCCTGGCGTGCTAAAT     |
|                                    | antisense | CACCAGTAAGGCGGTCAGAT     |
| <i>Bsal</i> : G2M_08767            | sense     | ACGAGCGACGAGCATATAACC    |
|                                    | antisense | CACCAGTGTTTGCATTGACC     |
| <i>Bsal</i> : G2M_08444            | sense     | CTGTGATGGGGAGCTATTGG     |
|                                    | antisense | GAAACGATACCGCCAGTGTT     |
| <i>Bsal</i> : G1M_06223            | sense     | CAGTTCACGTCGTGATGTC      |
|                                    | antisense | TCCTTTGATCTCAGGGTTGG     |
| <i>Bsal</i> : G1M_04381            | sense     | TGATGGACAACCAGGAGTGA     |
|                                    | antisense | CCATGTGCATACTCGTGGAG     |
| <i>Bsal</i> : CBM18_04331          | sense     | TCCATATGATCTCGGGTGGT     |
|                                    | antisense | CAGCAGCGTCAATAGTCCAA     |
| <i>Bsal</i> : CBM18_07447          | sense     | ATACCGATACGCCTGTTGGA     |
|                                    | antisense | ACAGAAGCCAGTTGGTGAGC     |
| <i>Bsal</i> : CBM18_08642          | sense     | CAGCACCCAACCCTAAGATG     |
|                                    | antisense | CAAAGAGACCGGGACTGGTA     |
| <i>Bsal</i> : BS_08614             | sense     | CGTTGGAGATGGTGTGTTG      |
|                                    | antisense | CAGGGCCATCAATCTTCTGT     |
| <i>Bsal</i> : BS_08640             | sense     | GACAAGGCCGAAC TTGGTT     |
|                                    | antisense | CGGGCATTTCACATACTCC      |
| <i>Bsal</i> : BS_06099             | sense     | TATGTGCTGCTGCCATTGGA     |
|                                    | antisense | CTTGCTGTTGAGCTTGCTG      |
| <i>Bsal</i> : BS_07451             | sense     | TTTGCACTGCAGACCTCAAG     |
|                                    | antisense | GGCACCTGGTGT TTTGTTCT    |
| <i>Bsal</i> : CRN_00955            | sense     | TATGATGGGAAGCCTCAGGA     |
|                                    | antisense | TCGCCCTTTACAATCTCGTC     |
| <i>Bsal</i> : CRN_06851            | sense     | GAAATGGGTGGAATGGACAC     |
|                                    | antisense | AAGTTGGCCCTCTTGAATC      |
